# Supplementary material for: Characteristics and Outcomes of Dogs Admitted into Queensland RSPCA Shelters
Source: PubMed Central journal article supplement (PMC5615298; doi:10.3390/ani7090067), 2017-09-01
Supplement: animals-07-00067-s001.pdf [file animals-07-00067-s001.pdf]

**Table S1.** Original source of admission organized into seven categories.

| Source of Admission Categories | Original RSPCA Categories                                                     | Definition                                                                                                                                                                                                                                                                                                        |
|--------------------------------|-------------------------------------------------------------------------------|-------------------------------------------------------------------------------------------------------------------------------------------------------------------------------------------------------------------------------------------------------------------------------------------------------------------|
| Council                        | Council                                                                       | Dogs accepted by the RSPCA from municipal pounds under a municipal pound contract                                                                                                                                                                                                                                 |
| Stray                          | Stray                                                                         | Lost/found dogs presented by a member of the public who is not the owner, or an agent of the owner                                                                                                                                                                                                                |
| Owner Surrender                | Ambulance- Owner Surrendered<br>Humane officer surrendered<br>Owner surrender | Dogs presented to the shelter (or agent of the shelter) by the owner or agent of the owner                                                                                                                                                                                                                        |
| Euthanasia Request             | Euthanasia Request<br>Humane officer- Euthanasia Request                      | Dogs presented to the shelter with the owner's request to euthanize                                                                                                                                                                                                                                               |
| Humane Officer                 | Ambulance<br>Humane officer<br>Humane officer seized                          | Dogs presented to the shelter by an agent of the shelter, other than municipal pounds (i.e., inspectors, humane officers and animal ambulance officers)                                                                                                                                                           |
| Offspring                      | Cruelty case offspring<br>Foster offspring<br>Shelter offspring               | Dogs born under shelter or foster care                                                                                                                                                                                                                                                                            |
| Other                          | Bequest in shelter<br>Emergency boarding<br>Returns<br>Transfer in            | Bequest in shelter: Dogs willed to the RSPCA by a deceased estate<br>Emergency boarding: Dogs under temporary care of the shelter due to owner's circumstances<br>Returns: Dogs adopted but returned to the shelter within a defined period<br>Transfer in: Dogs transferred from other shelters or organizations |

**Table S2.** Original surrender reasons organized into human or dog related factors, categories and subcategories.

| Human/Dog Related Factor | Surrender Reason Category | Surrender Reason Sub-Category | Original RSPCA Surrender Reason      |
|--------------------------|---------------------------|-------------------------------|--------------------------------------|
| Dog                      | Behavior                  | Aggression-Animal             | Aggression to Animals                |
|                          |                           |                               | Behavior/Temperament of Existing Pet |
|                          |                           | Aggressive-Human or Animal    | Food Protective                      |
|                          |                           |                               | Resource Guarding/Over Protective    |
|                          |                           | Aggressive-People             | Intolerant of children               |
|                          |                           |                               | Snapping at Children                 |
|                          |                           |                               | Aggression to People                 |
|                          |                           | Barking                       | Barking                              |
|                          |                           | Destructive                   | Chewing                              |
|                          |                           |                               | Destructive                          |
|                          |                           |                               | Digging Yard                         |
|                          |                           | Escape                        | Digging Out                          |
|                          |                           |                               | Jumping The Fence                    |
| Keeps Getting Out        |                           |                               |                                      |
| Fear                     | Noise/Storm Phobic        |                               |                                      |
|                          | Separation Anxiety        |                               |                                      |

| Human/Dog Related Factor | Surrender Reason Category | Surrender Reason Sub-Category                  | Original RSPCA Surrender Reason                  |
|--------------------------|---------------------------|------------------------------------------------|--------------------------------------------------|
|                          |                           |                                                | Timid/Fearful/Not Coping in Household            |
|                          |                           | House soiling                                  | Inappropriate toileting                          |
|                          |                           | Other                                          | This pet does not get on with existing pet       |
|                          |                           | Boisterous                                     | Boisterous                                       |
|                          |                           |                                                | Too Boisterous                                   |
|                          |                           | Predatory behavior                             | Attacking Livestock                              |
|                          |                           |                                                | Killing Wildlife                                 |
|                          | Dog Health                |                                                | Animal Medical Condition - Blind                 |
|                          | Dog size                  |                                                | Dog got too Big                                  |
| Human                    | Accommodation             | Owner in care                                  | Owner Going into Care Facility - no pets allowed |
|                          |                           | Property unsuitable                            | Cannot Contain on Property (Council Regulations) |
|                          |                           | Acquired without consent of household/landlord | Acquired without consent of household/landlord   |
|                          |                           | Landlord will not allow                        | Landlord will not allow                          |
|                          |                           | Yard too Small                                 | Yard too Small                                   |
|                          | Changed circumstances     | Household dynamic                              | Relation Split                                   |
|                          |                           |                                                | Change of Household dynamic                      |
|                          |                           | Moving/Travelling                              | Moving House                                     |
|                          |                           |                                                | Moving Overseas/Interstate                       |
|                          |                           |                                                | Travelling                                       |
|                          |                           |                                                | going on holidays                                |
|                          |                           |                                                | Owner Homeless                                   |
|                          |                           | New baby                                       | New Baby                                         |
|                          |                           | Unspecified                                    | Personal Reasons: Change in circumstance         |
|                          | Commercial                |                                                | No Good For Racing                               |
|                          | Financial                 |                                                | Can't Afford                                     |
|                          |                           |                                                | Cannot Afford Desexing (for registration)        |
|                          |                           |                                                | Cannot afford vet fees                           |
|                          |                           |                                                | Surrender to Council-cannot afford fees          |
|                          | Owner Health              | Owner Allergic                                 | Allergic                                         |
|                          |                           | Owner Ill                                      | Owner-Ill Health                                 |
|                          |                           | Owner Deceased                                 | Owner Deceased                                   |
|                          | Unwanted                  | Other                                          | Previous owner left over four weeks ago          |
|                          |                           |                                                | Unwanted                                         |
|                          |                           |                                                | Formerly Stray                                   |
|                          |                           |                                                | Unwanted Gift                                    |
|                          |                           | Poor decision                                  | Impulse Buy                                      |
|                          |                           |                                                | No Time                                          |
|                          |                           |                                                | Poor choice                                      |
|                          |                           | Too many                                       | Last of Litter                                   |
|                          |                           |                                                | Too Many Dogs                                    |
|                          |                           |                                                | Unwanted litter                                  |
|                          |                           | Unspecified                                    | Owner surrendered to external stakeholder        |
|                          |                           |                                                | Surrendered to Council-reason not specified      |
| Other                    | Other                     |                                                | Other                                            |

Table S3. Original outcomes organized into eight categories [52].

| Outcome Categories | Original RSPCA Categories |
|--------------------|---------------------------|
| Adopted            | Adopted                   |

|                  |                                                                                                                                                                                            |
|------------------|--------------------------------------------------------------------------------------------------------------------------------------------------------------------------------------------|
|                  | Adopted offsite<br>Adopted to finder                                                                                                                                                       |
| Reclaimed        | Emergency boarding returned to owner<br>Reclaimed<br>Redemption (offsite)<br>Released to owner at vet<br>Returned home<br>Returned protective custody animal<br>Returned surrender         |
| Euthanized       | Euthanasia in field<br>Euthanized<br>Euthanized by offsite vet<br>Euthanasia/cremation request                                                                                             |
| In Shelter       | In shelter<br>Available for adoption<br>Available for adoption- no web presence<br>Court hold<br>Police hold<br>Sanctuary/life resident<br>Stray hold<br>Under vet care<br>Unresolved file |
| In Foster        | Available for adoption- In foster<br>Awaiting spay/neuter- In foster<br>In foster                                                                                                          |
| Unassisted death | Deceased<br>Unassisted death<br>Unassisted death-in foster                                                                                                                                 |
| Transferred out  | Transfer out                                                                                                                                                                               |
| Other            | Escaped<br>Matched<br>Possible match<br>Privately rehomed-new owner unknown<br>Stolen                                                                                                      |

**Table S4.** Original euthanasia reasons organized into categories and subcategories.

| <b>Euthanasia Reason Category</b> | <b>Euthanasia Reason Sub-Category</b>       | <b>Original RSPCA Euthanasia Reason</b> |
|-----------------------------------|---------------------------------------------|-----------------------------------------|
| Age                               | Too old                                     | Old                                     |
|                                   | Too young                                   | Too young < six weeks or under 500grams |
| Behavior                          | Aggression-Directed towards animals         | Aggression-Inter Cat                    |
|                                   |                                             | Aggressive-Dog                          |
|                                   | Aggression-Target not defined               | Aggression-Fence Aggressive             |
|                                   |                                             | Aggression-Redirected Aggression        |
|                                   |                                             | Declared Dangerous                      |
|                                   |                                             | Guarding Behaviors-Resource Guarding    |
|                                   | Aggression-Directed towards humans          | Untrustworthy                           |
|                                   |                                             | Dominance Aggression                    |
|                                   | Escaping                                    | Aggressive-Humans                       |
|                                   | Personality-Other                           | Fearful/aggressive                      |
| Escape Behavior                   |                                             |                                         |
| Personality-Fearful               | Compulsive; obsessive; stereotypic behavior |                                         |
|                                   | Hyper Reactivity To Stimuli                 |                                         |
|                                   | Separation Anxiety                          |                                         |
|                                   |                                             | Timid/fearful With Accompanying Anxiety |

| Euthanasia Reason Category | Euthanasia Reason Sub-Category | Original RSPCA Euthanasia Reason                              |                       |
|----------------------------|--------------------------------|---------------------------------------------------------------|-----------------------|
|                            |                                | Under socialized-Not Coping<br>Not Coping in Pens-Pen Running |                       |
| Feral/Wild dog             | Feral/Wild dog                 | Feral                                                         |                       |
| Health                     | Cancer                         | Malignancy (cancer)                                           |                       |
|                            | Cardiac                        | Cardiac Disease                                               |                       |
|                            | Heartworm                      | Heartworm Positive                                            |                       |
|                            | Dental                         | Dental Disease                                                |                       |
|                            | Ear                            | Chronic Ear Infection/Problems                                |                       |
|                            | Musculoskeletal                |                                                               | Injured               |
|                            |                                |                                                               | Orthopedic Problems   |
|                            |                                | Neurological                                                  | Neurological Problems |
|                            |                                |                                                               | Paralysis             |
|                            |                                |                                                               | Neurological          |
|                            | Ocular                         |                                                               | Blind                 |
|                            | Parvovirus                     |                                                               | Parvo                 |
|                            |                                |                                                               | Parvo Contact         |
| Skin                       |                                | Excessive Scarring                                            |                       |
|                            |                                | Hair loss-Demodex                                             |                       |
|                            |                                | Hair loss-Nonspecific                                         |                       |
|                            |                                | Hair loss-Ringworm                                            |                       |
| Tick                       |                                | Tick Paralysis                                                |                       |
| Unspecified                |                                | Humane Grounds                                                |                       |
|                            |                                | Sick                                                          |                       |
| Owner requested            | Owner Requested                | Owner Requested (Please specify in text box)                  |                       |
| Restricted Breed           | Restricted Breed               | Restricted Breed                                              |                       |

**Table S5.** List of suburbs for postcodes listed in Table 3 [52].

| Postcode | Suburbs                                                                                                                                                                                                                                                                                                                                                                                                                                                                                                                                                                                                                                      |
|----------|----------------------------------------------------------------------------------------------------------------------------------------------------------------------------------------------------------------------------------------------------------------------------------------------------------------------------------------------------------------------------------------------------------------------------------------------------------------------------------------------------------------------------------------------------------------------------------------------------------------------------------------------|
| 4019     | Margate Beach, Woody Point, Clontarf Beach, Clontarf, Margate, Clontarf Dc                                                                                                                                                                                                                                                                                                                                                                                                                                                                                                                                                                   |
| 4021     | Kippa-Ring                                                                                                                                                                                                                                                                                                                                                                                                                                                                                                                                                                                                                                   |
| 4076     | Darra, Wacol                                                                                                                                                                                                                                                                                                                                                                                                                                                                                                                                                                                                                                 |
| 4300     | Springfield, Springfield Central, Gales, Goodna, Springfield Lakes, Augustine Heights, Brookwater, Bellbird Park, Carole Park, Camira                                                                                                                                                                                                                                                                                                                                                                                                                                                                                                        |
| 4350     | Finnie, East Toowoomba, Gowrie Mountain, Glenvale, Darling Heights, Cranley, Drayton North, Drayton, Charlton, Centenary Heights, Cotswold Hills, Clifford Gardens, Blue Mountain Heights, Athol, Middle Ridge, Kearneys Spring, Harristown, Harlaxton, Newtown, Mount Rascal, Mount Lofty, Mount Kynoch, Prince Henry Heights, Northpoint, Northlands, North Toowoomba, South Toowoomba, Rockville, Redwood, Rangeville, Toowoomba City, Toowoomba Dc, Southtown, Toowoomba, Toowoomba Village Fair, Toowoomba West, Toowoomba East, Toowoomba South, Wellcamp, Westbrook, Top Camp, Torrington, Wyalla Plaza, Wilsonton, Wilsonton Heights |
| 4500     | Cashmere, Clear Mountain, Joyner, Strathpine, Bray Park, Brendale, Brendale Bc, Brendale Dc, Warner, Strathpine Centre                                                                                                                                                                                                                                                                                                                                                                                                                                                                                                                       |
| 4501     | Lawnton                                                                                                                                                                                                                                                                                                                                                                                                                                                                                                                                                                                                                                      |
| 4502     | Petrie                                                                                                                                                                                                                                                                                                                                                                                                                                                                                                                                                                                                                                       |
| 4503     | Kurwongbah, Kallangur, Griffin, Dakabin, Whiteside, Murrumba Downs                                                                                                                                                                                                                                                                                                                                                                                                                                                                                                                                                                           |
| 4504     | Narangba                                                                                                                                                                                                                                                                                                                                                                                                                                                                                                                                                                                                                                     |
| 4505     | Burpengary, Burpengary East, Burpengary Dc                                                                                                                                                                                                                                                                                                                                                                                                                                                                                                                                                                                                   |
| 4506     | Morayfield, Moorina                                                                                                                                                                                                                                                                                                                                                                                                                                                                                                                                                                                                                          |
| 4508     | Deception Bay                                                                                                                                                                                                                                                                                                                                                                                                                                                                                                                                                                                                                                |

|      |                                                                                                                                                                                                                                                                                                                                                                                                                                                                                                                                                                                                                                                                                                                                                                                                                                                                                                                                                                                                                                               |
|------|-----------------------------------------------------------------------------------------------------------------------------------------------------------------------------------------------------------------------------------------------------------------------------------------------------------------------------------------------------------------------------------------------------------------------------------------------------------------------------------------------------------------------------------------------------------------------------------------------------------------------------------------------------------------------------------------------------------------------------------------------------------------------------------------------------------------------------------------------------------------------------------------------------------------------------------------------------------------------------------------------------------------------------------------------|
| 4510 | Meldale, Donnybrook, Rocksberg, Moodlu, Upper Caboolture, Toorbul, Beachmere, Caboolture BC, Caboolture South, Bellmere, Caboolture                                                                                                                                                                                                                                                                                                                                                                                                                                                                                                                                                                                                                                                                                                                                                                                                                                                                                                           |
| 4562 | Weyba Downs, Verrierdale, Doonan, Belli Park, Eumundi, Eerwah Vale                                                                                                                                                                                                                                                                                                                                                                                                                                                                                                                                                                                                                                                                                                                                                                                                                                                                                                                                                                            |
| 4570 | Gilldora, Glanmire, East Deep Creek, Fishermans Pocket, Dagon, Downsfield, Corella, Curra, Gympie, Gympie Dc, Greens Creek, Gunalda, Glenwood, Goomboorian, Glastonbury, Glen Echo, Bollier, Bells Bridge, Bella Creek, Beenaam Valley, Banks Pocket, Araluen, Anderleigh, Amamoor Creek, Coondoo, Coles Creek, Chatsworth, Cedar Pocket, Canina, Calico Creek, Calgoa, Brooloo, Amamoor, Wolvi, Woolooga, Widgee Crossing South, Wilsons Pocket, Woondum, The Palms, The Dawn, Tandur, Tamaree, Tuchekei, Traveston, Toolara Forest, Theebine, Veteran, Upper Kandanga, Upper Glastonbury, Two Mile, Widgee Crossing North, Widgee, Wallu, Victory Heights, Miva, Monkland, Mooloo, Mothar Mountain, Munna Creek, Nahrunda, Neerdie, Neusa Vale, North Deep Creek, Paterson, Pie Creek, Ross Creek, Scotchy Pocket, Scrubby Creek, Sexton, Southside, Jones Hill, Imbil, Kandanga Creek, Kandanga, Kia Ora, Kanigan, Lagoon Pocket, Kybong, Langshaw, Lake Borumba, Lower Wonga, Long Flat, Marys Creek, Marodian, Melawondi, Mcintosh Creek |
| 4580 | Tin Can Bay, Cooloola, Cooloola Cove                                                                                                                                                                                                                                                                                                                                                                                                                                                                                                                                                                                                                                                                                                                                                                                                                                                                                                                                                                                                          |
| 4610 | Kingaroy, Ironpot, Inverlaw, Hodgeleigh, Haly Creek, Gordonbrook, Goodger, Ellesmere, Wattle Grove, Taabinga, Memerambi, Mannuem, Kumbia, Kingaroy Dc, Ballogie, Benair, Alice Creek, Dangore, Durong, Corndale, Crawford, Chahpingah, Coolabunia, Boobie, Boyneside                                                                                                                                                                                                                                                                                                                                                                                                                                                                                                                                                                                                                                                                                                                                                                          |
| 4615 | Wengenville, Wattle Camp, Tarong, South Nanango, Wyalla, East Nanango, Bullcamp, Glan Devon, Elgin Vale, Brooklands, Barker Creek Flat, Runnymede, Pimpimbudgee, South East Nanango, Sandy Ridges, Kunioon, Johnstown, Nanango, Maidenwell                                                                                                                                                                                                                                                                                                                                                                                                                                                                                                                                                                                                                                                                                                                                                                                                    |
| 4670 | Windermere, Welcome Creek, Woongarra, Winfield, Sharon, Rubyanna, South Kolan, South Bingera, Thabeban, Svensson Heights, Watalgan, Walkervale, Abbotsford, Bargara, Avondale, Bucca, Branyan, Ashfield, Alloway, Avoca, Avenell Heights, Bundaberg West, Burnett Heads, Bundaberg North, Bundaberg South, Bundaberg Dc, Bundaberg East, Bundaberg, Bundaberg Central, Fairymead, Givelda, Elliott, Elliott Heads, Coral Cove, Electra, Calavos, Coonarr, Millbank, Meadowvale, Kinkuna, Kepnock, Kensington, Kalkie, Innes Park, Gooburrum, Qunaba, Pine Creek, Oakwood, Norville, Mullett Creek, Moorland, Moore Park Beach, Mon Repos                                                                                                                                                                                                                                                                                                                                                                                                      |
| 4680 | Boyne Valley, Boyne Island, Builyan, Boynedale, Barney Point, Benaraby, Beecher, Glen Eden, Heron Island, Iveragh, Kin Kora, Gladstone Bc, Gladstone Central, Gladstone Dc, Gladstone Harbour, Clinton, Curtis Island, Diglum, Gladstone, Burua, Byellee, Callemondah, Calliope, West Gladstone, Ubobo, Toolooa, Telina, Taragoola, Tannum Sands, Tablelands, Sun Valley, South Trees, South Gladstone, South End, River Ranch, O'connell, New Auckland, Mount Alma, Kirkwood, Wurdong Heights, West Stowe, Wooderson                                                                                                                                                                                                                                                                                                                                                                                                                                                                                                                         |
| 4810 | Belgian Gardens, Townsville City, Townsville DC, Town Common, Townsville, Townsville MC, West End, North Ward, Pallarenda, Cape Cleveland, Castle Hill, Shelly Beach, South Townsville, Railway Estate, Rowes Bay                                                                                                                                                                                                                                                                                                                                                                                                                                                                                                                                                                                                                                                                                                                                                                                                                             |
| 4812 | Hyde Park Castletown, Hyde Park, Hermit Park, Gulliver, Rosslea, Pimlico, Mysterton, Mundingburra, Currajong                                                                                                                                                                                                                                                                                                                                                                                                                                                                                                                                                                                                                                                                                                                                                                                                                                                                                                                                  |
| 4814 | Mount Louisa, Murray, Thuringowa Dc, Vincent, Aitkenvale, Annandale, Cranbrook, Douglas, Garbutt, Garbutt East, Heatley                                                                                                                                                                                                                                                                                                                                                                                                                                                                                                                                                                                                                                                                                                                                                                                                                                                                                                                       |
| 4815 | Rasmussen, Pinnacles, Condon, Granite Vale, Gumlow, Kelso                                                                                                                                                                                                                                                                                                                                                                                                                                                                                                                                                                                                                                                                                                                                                                                                                                                                                                                                                                                     |
| 4817 | Thuringowa Central, Rangewood, Kirwan, Hervey Range, Bohle Plains, Alice River                                                                                                                                                                                                                                                                                                                                                                                                                                                                                                                                                                                                                                                                                                                                                                                                                                                                                                                                                                |
| 4818 | Black River, Beach Holm, Saunders Beach, Shaw, Toolakea, Yabulu, Jensen, Lynam, Mount Low, Mount St John, Burdell, Bushland Beach, Cosgrove, Deeragun, Blue Hills, Bluewater, Bluewater Park, Bohle                                                                                                                                                                                                                                                                                                                                                                                                                                                                                                                                                                                                                                                                                                                                                                                                                                           |
